# Supplementary material for: Prevalence and influencing factors of pandemic fatigue among Chinese public in Xi'an city during COVID-19 new normal: a cross-sectional study
Source: PubMed Central journal article supplement (PMC9511105; doi:10.3389/fpubh.2022.971115), 2022-09-12
Supplement: Data_Sheet_1.pdf [file Data_Sheet_1.pdf]

## *Supplementary Material*

### 1 Supplementary Tables

**Supplementary Table 1.** Questionnaire to evaluate knowledge, attitude, and practice among participants regarding COVID-19

| COVID-19 knowledge items                                                                                                                                             | Answers                                                                                                       |
|----------------------------------------------------------------------------------------------------------------------------------------------------------------------|---------------------------------------------------------------------------------------------------------------|
| <b>Item 1:</b> Transmission route of COVID-19 is:                                                                                                                    | ① Droplet respiratory particles<br>② Air<br>③ Contact goods contaminated by coronavirus<br>④ All of the above |
| <b>Item 2:</b> With the mutation of coronavirus, the infectivity of current epidemic strains has increased.                                                          | ① yes<br>② no<br>③ I do not know                                                                              |
| <b>Item 3:</b> Children, the elderly, and people with chronic diseases are susceptible to COVID-19.                                                                  | ① yes<br>② no<br>③ I do not know                                                                              |
| <b>Item 4:</b> Patients with symptoms of COVID-19 infection mostly showed flu-like symptoms, such as headache, sore throat, runny nose, fever, and persistent cough. | ① yes<br>② no<br>③ I do not know                                                                              |
| <b>Item 5:</b> COVID-19 is “influenza major.”                                                                                                                        | ① yes<br>② no<br>③ I do not know                                                                              |
| <b>Item 6:</b> Patients infected with COVID-19 could have no obvious clinical symptoms.                                                                              | ① yes<br>② no<br>③ I do not know                                                                              |
| <b>Item 7:</b> Asymptomatic cases are also contagious                                                                                                                | ① yes<br>② no<br>③ I do not know                                                                              |
| <b>Item 8:</b> Only wearing multi-layer masks can prevent COVID-19.                                                                                                  | ① yes<br>② no<br>③ I do not know                                                                              |
| <b>Item 9:</b> Disposable surgical masks can be used repeatedly for a long time as long as they are not worn.                                                        | ① yes<br>② no<br>③ I do not know                                                                              |
| <b>Item 10:</b> Chinese-manufactured vaccines are effective against the constantly mutating strain, such as Delta and Omicron.                                       | ① yes<br>② no<br>③ I do not know                                                                              |
| <b>Item 11:</b> People who have been vaccinated cannot be infected with COVID-19.                                                                                    | ① yes<br>② no<br>③ I do not know                                                                              |
| <b>Item 12:</b> A safe social distance of more than one meter should be maintained in public places during the pandemic.                                             | ① yes<br>② no<br>③ I do not know                                                                              |
| <b>Item 13:</b> The “Dynamic-zero COVID-19 policy” adopted by China                                                                                                  | ① yes                                                                                                         |

|                                                                                                                                                                                                     |                                                                          |
|-----------------------------------------------------------------------------------------------------------------------------------------------------------------------------------------------------|--------------------------------------------------------------------------|
| means “zero infection.”                                                                                                                                                                             | ②no<br>③I do not know                                                    |
| <b>Item 14:</b> People returning home from medium- and high-risk areas within 14 days only need to provide negative nucleic acid test results, and centralized or home quarantine is not necessary. | ①yes<br>②no<br>③I do not know                                            |
| <b>Item 15:</b> If there is an epidemic in your community, you can escape before lockdown.                                                                                                          | ①yes<br>②no<br>③I do not know                                            |
| <b>Item 16:</b> If you have suspected symptoms related to COVID-19, you can take public transport to the hospital.                                                                                  | ①yes<br>②no<br>③I do not know                                            |
| <b>COVID-19 attitude items</b>                                                                                                                                                                      | <b>Answers</b>                                                           |
| <b>Item 17:</b> Do you currently actively pay attention to the situation of COVID-19 at home and abroad?                                                                                            | ①strongly disagree<br>②disagree<br>③general<br>④agree<br>⑤strongly agree |
| <b>Item 18:</b> Do you agree with the “Dynamic zero COVID-19 strategy” adopted by China?                                                                                                            | ①strongly disagree<br>②disagree<br>③general<br>④agree<br>⑤strongly agree |
| <b>Item 19:</b> Do you agree that China can successfully prevent infection from imported strains?                                                                                                   | ①strongly disagree<br>②disagree<br>③general<br>④agree<br>⑤strongly agree |
| <b>Item 20:</b> Do you agree that China can successfully cope with the domestic epidemic?                                                                                                           | ①strongly disagree<br>②disagree<br>③general<br>④agree<br>⑤strongly agree |
| <b>Item 21:</b> Do you agree that coping with COVID-19 requires the efforts of the whole society?                                                                                                   | ①strongly disagree<br>②disagree<br>③general<br>④agree<br>⑤strongly agree |
| <b>Item 22:</b> Do you agree that good vaccination coverage is effective in infection prevention and control?                                                                                       | ①strongly disagree<br>②disagree<br>③general<br>④agree<br>⑤strongly agree |
| <b>Item 23:</b> Do you discriminate or ostracize COVID-19 patients or communities they live in?                                                                                                     | ①strongly disagree<br>②disagree<br>③general<br>④agree<br>⑤strongly agree |
| <b>COVID-19 practice items</b>                                                                                                                                                                      | <b>Answers</b>                                                           |
| <b>Item 24:</b> Would you cooperate with national nucleic acid tests?                                                                                                                               | ①never<br>②occasionally                                                  |

|                                                                                                                                                                                                          |                                                                                                                                                                               |
|----------------------------------------------------------------------------------------------------------------------------------------------------------------------------------------------------------|-------------------------------------------------------------------------------------------------------------------------------------------------------------------------------|
|                                                                                                                                                                                                          | <input type="radio"/> ③ sometimes<br><input type="radio"/> ④ often<br><input type="radio"/> ⑤ always                                                                          |
| <b>Item 25:</b> Would you report to the infection prevention department after having contact with people infected with COVID-19 or experiencing suspected symptoms?                                      | <input type="radio"/> ① never<br><input type="radio"/> ② occasionally<br><input type="radio"/> ③ sometimes<br><input type="radio"/> ④ often<br><input type="radio"/> ⑤ always |
| <b>Item 26:</b> Would you cooperate with epidemiological investigations?                                                                                                                                 | <input type="radio"/> ① never<br><input type="radio"/> ② occasionally<br><input type="radio"/> ③ sometimes<br><input type="radio"/> ④ often<br><input type="radio"/> ⑤ always |
| <b>Item 27:</b> If you cough or sneeze, do you consciously cover your nose and mouth with a paper towel, handkerchief, or cloth?                                                                         | <input type="radio"/> ① never<br><input type="radio"/> ② occasionally<br><input type="radio"/> ③ sometimes<br><input type="radio"/> ④ often<br><input type="radio"/> ⑤ always |
| <b>Item 28:</b> Do you immediately disinfect the packages after collecting them?                                                                                                                         | <input type="radio"/> ① never<br><input type="radio"/> ② occasionally<br><input type="radio"/> ③ sometimes<br><input type="radio"/> ④ often<br><input type="radio"/> ⑤ always |
| <b>Item 29:</b> Do you wash your hands after coming home?                                                                                                                                                | <input type="radio"/> ① never<br><input type="radio"/> ② occasionally<br><input type="radio"/> ③ sometimes<br><input type="radio"/> ④ often<br><input type="radio"/> ⑤ always |
| <b>Item 30:</b> When entering public places, such as restaurants, workplaces, and supermarkets, do you cooperate with anti-infection measures, including scanning health codes and checking temperature? | <input type="radio"/> ① never<br><input type="radio"/> ② occasionally<br><input type="radio"/> ③ sometimes<br><input type="radio"/> ④ often<br><input type="radio"/> ⑤ always |
| <b>Item 31:</b> Do you actively participate in community infection prevention and control and provide suggestions for infection prevention and control?                                                  | <input type="radio"/> ① never<br><input type="radio"/> ② occasionally<br><input type="radio"/> ③ sometimes<br><input type="radio"/> ④ often<br><input type="radio"/> ⑤ always |
| <b>Item 32:</b> Do you actively observe social distancing guidelines, such as maintaining a safe social distance and avoiding parties?                                                                   | <input type="radio"/> ① never<br><input type="radio"/> ② occasionally<br><input type="radio"/> ③ sometimes<br><input type="radio"/> ④ often<br><input type="radio"/> ⑤ always |
| <b>Item 33:</b> Do you avoid forwarding or spreading false information about COVID-19 during the pandemic?                                                                                               | <input type="radio"/> ① never<br><input type="radio"/> ② occasionally<br><input type="radio"/> ③ sometimes<br><input type="radio"/> ④ often<br><input type="radio"/> ⑤ always |
| <b>Item 34:</b> Have you engaged in cyber-bullying of COVID-19 patients or close contacts?                                                                                                               | <input type="radio"/> ① never<br><input type="radio"/> ② occasionally                                                                                                         |

|  |                                    |
|--|------------------------------------|
|  | ③ sometimes<br>④ often<br>⑤ always |
|--|------------------------------------|

Items 23 and 34 are reverse-scored

**Supplementary Table 2.** Participants' COVID-19 attitude Scores

| Attitude items                                                                                | lower<br>good<br>(n = 473) | than<br>higher | good and<br>than good<br>(n = 881) | Total<br>(n = 1354) |
|-----------------------------------------------------------------------------------------------|----------------------------|----------------|------------------------------------|---------------------|
| Do you discriminate or ostracize COVID-19 patients or the communities in which they live?     | 3.07 ± 1.11                |                | 4.06 ± 1.16                        | 3.71 ± 1.23         |
| Are you currently actively paying attention to the COVID-19 situation at home and abroad?     | 3.51 ± 0.91                |                | 4.25 ± 0.70                        | 3.99 ± 0.85         |
| Do you agree that China can successfully prevent infection from imported strains?             | 3.69 ± 0.87                |                | 4.64 ± 0.57                        | 4.31 ± 0.83         |
| Do you agree with the “Dynamic zero COVID-19 strategy” adopted by China?                      | 3.87 ± 0.80                |                | 4.73 ± 0.48                        | 4.43 ± 0.73         |
| Do you agree that China can successfully cope with the domestic epidemic?                     | 3.95 ± 0.79                |                | 4.78 ± 0.44                        | 4.49 ± 0.70         |
| Do you agree that good vaccination coverage is effective in infection prevention and control? | 4.08 ± 0.85                |                | 4.80 ± 0.42                        | 4.55 ± 0.70         |
| Do you agree that coping with COVID-19 requires the efforts of the whole society?             | 4.51 ± 0.78                |                | 4.96 ± 0.19                        | 4.80 ± 0.54         |

**Supplementary Table 3.** Participants' COVID-19 practice Scores

| Practice items                                                                                                                                                                           | lower than good<br>(n = 389) | than good and higher<br>(n = 965) | Total<br>(n = 1354) |
|------------------------------------------------------------------------------------------------------------------------------------------------------------------------------------------|------------------------------|-----------------------------------|---------------------|
| Do you immediately disinfect the packages after collecting them?                                                                                                                         | 2.50 ± 1.13                  | 3.83 ± 1.11                       | 3.45 ± 1.27         |
| Do you actively participate in community infection prevention and control and provide suggestions for infection prevention and control?                                                  | 3.18 ± 1.13                  | 4.17 ± 0.96                       | 3.89 ± 1.10         |
| Do you wash your hands after coming home?                                                                                                                                                | 3.44 ± 1.11                  | 4.53 ± 0.69                       | 4.21 ± 0.97         |
| Have you engaged in cyber-bullying of COVID-19 patients or close contacts?                                                                                                               | 3.89 ± 1.53                  | 4.36 ± 1.42                       | 4.22 ± 1.47         |
| Do you actively observe social distancing guidelines, such as maintaining a safe social distance and avoiding parties?                                                                   | 3.80 ± 0.95                  | 4.67 ± 0.58                       | 4.42 ± 0.81         |
| Would you report to the infection prevention department after having contact with people infected with COVID-19 or experiencing suspected symptoms?                                      | 3.97 ± 1.01                  | 4.75 ± 0.55                       | 4.53 ± 0.80         |
| If you cough or sneeze, do you consciously cover your nose and mouth with a paper towel, handkerchief, or cloth?                                                                         | 4.11 ± 0.96                  | 4.79 ± 0.49                       | 4.60 ± 0.73         |
| Do you avoid forwarding or spreading false information about COVID-19 during the pandemic?                                                                                               | 4.19 ± 1.09                  | 4.84 ± 0.53                       | 4.65 ± 0.79         |
| Would you cooperate with epidemiological investigations?                                                                                                                                 | 4.31 ± 0.82                  | 4.88 ± 0.38                       | 4.71 ± 0.60         |
| When entering public places, such as restaurants, workplaces, and supermarkets, do you cooperate with anti-infection measures, including scanning health codes and checking temperature? | 4.33 ± 0.83                  | 4.92 ± 0.28                       | 4.75 ± 0.57         |
| Would you cooperate with national nucleic acid tests?                                                                                                                                    | 4.46 ± 0.80                  | 4.93 ± 0.26                       | 4.80 ± 0.53         |

## 2 Supplementary Figures

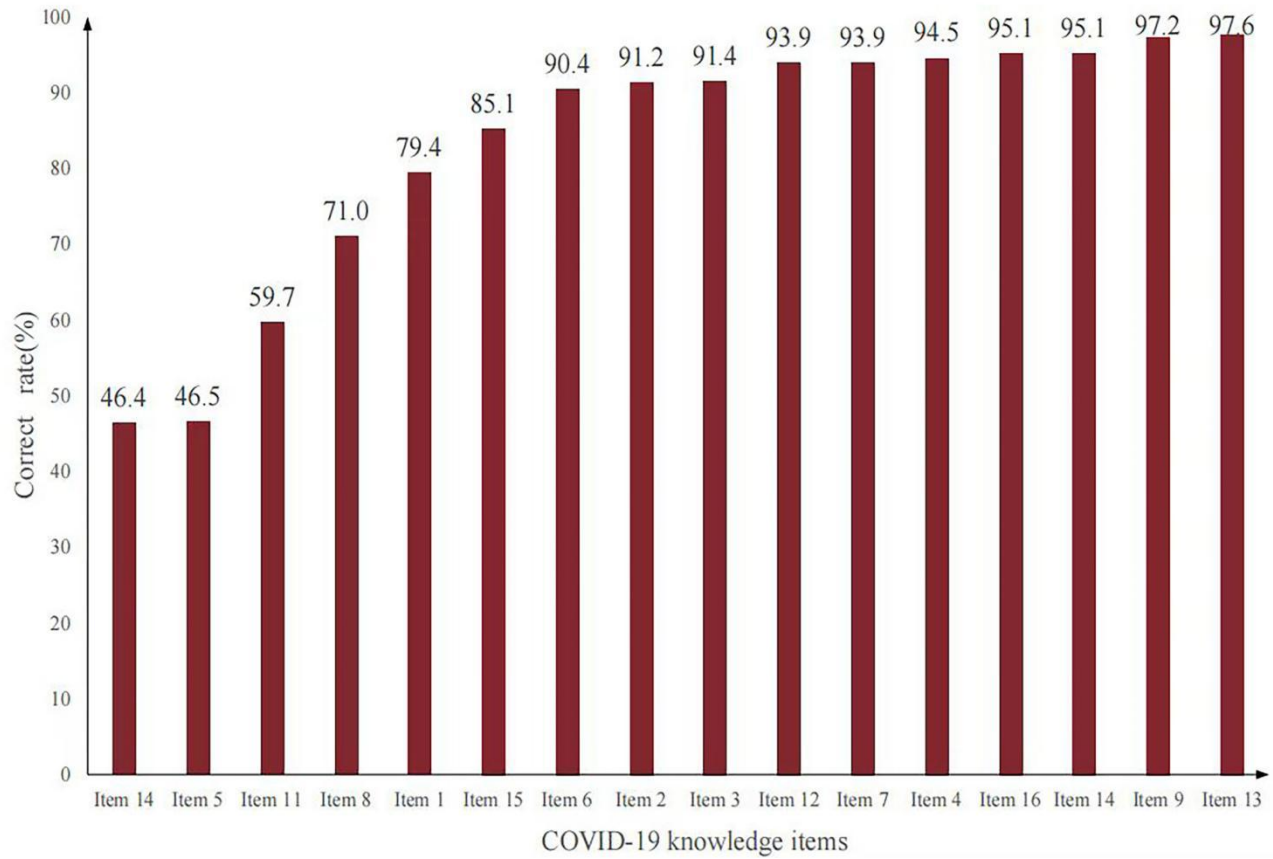

**Supplementary Figure 1.** Correctness rate of knowledge regarding COVID-2019 among participants.
